# Supplementary material for: Rapid diagnostic tests for molecular surveillance of Plasmodium falciparum malaria -assessment of DNA extraction methods and field applicability
Source: Malar J. 2013 Mar 19;12:106. doi: 10.1186/1475-2875-12-106 (PMC3605315; doi:10.1186/1475-2875-12-106)
Supplement: Additional file 1 — Sensitivity of RDT-DNA extraction methods in in vitro cultured parasites. Description: Raw data showing detection levels for the three PCR methods used in the in vitro part of the study. [file 1475-2875-12-106-S1.pdf]

**Additional Data:** Sensitivity of RDT-DNA extraction methods in *in vitro* cultured parasites. Raw Data showing detection levels for the three PCR methods used in the in vitro part of the study. A) 18S ribosomal DNA (rDNA) nested PCR, B) Cytochrome b nested PCR and C) 18s rDNA probe based real-time PCR. X marks a positive PCR in A and B; in C the minimum Cycle threshold (Ct) value is given. Detection limit was determined as the lowest consecutive positive.

| A) 18S rDNA nested PCR |                   |                   | Dilution series 1:10 (parasites / $\mu$ L) |        |      |     |    |   |     |      |   |
|------------------------|-------------------|-------------------|--------------------------------------------|--------|------|-----|----|---|-----|------|---|
| Extraction Method      | Extraction matrix | Extraction part   | 200,000                                    | 20,000 | 2000 | 200 | 20 | 2 | 0.2 | 0.02 | 0 |
| Simple elution         | Paracheck-Pf      | 1 cm              | X                                          |        |      |     |    |   |     |      |   |
|                        | SD-Bioline        | 1 cm              | X                                          | X      | X    | X   | X  |   |     |      |   |
|                        | Filter paper      | 5 $\mu$ L         | X                                          | X      | X    |     |    |   |     |      |   |
| Chelex-100             | Paracheck-Pf      | 1 cm              | X                                          | X      | X    | X   |    |   |     |      |   |
|                        |                   | Proximal half     | X                                          | X      | X    | X   |    |   |     |      |   |
|                        | SD-Bioline        | 1 cm              | X                                          | X      | X    | X   | X  |   |     |      |   |
|                        |                   | Proximal half     | X                                          | X      | X    | X   |    |   |     |      |   |
|                        | Filter paper      | 5 $\mu$ L         | X                                          | X      | X    | X   | X  |   |     |      |   |
| ABI                    | Paracheck-Pf      | 1 cm              | X                                          | X      | X    |     |    |   |     |      |   |
|                        |                   | Proximal half     | X                                          | X      | X    |     |    |   |     |      |   |
|                        |                   | Distal two-thirds | X                                          | X      | X    |     |    |   |     |      |   |
|                        |                   | Whole RDT         | X                                          | X      | X    | X   |    |   |     |      |   |
|                        | SD-Bioline        | 1 cm              | X                                          | X      | X    |     |    |   |     |      |   |
|                        |                   | Proximal half     | X                                          | X      | X    | X   |    |   |     |      |   |
|                        |                   | Distal two-thirds | X                                          | X      | X    |     |    |   |     |      |   |
|                        |                   | Whole RDT         | X                                          | X      |      | X   |    |   |     |      |   |
|                        | Filter paper      | 5 $\mu$ L         | X                                          | X      | X    |     |    |   |     |      |   |

| B) Cytochrome b nested PCR |                   |                   | Dilution series 1:10 (parasites/μL) |        |      |     |    |   |     |      |   |
|----------------------------|-------------------|-------------------|-------------------------------------|--------|------|-----|----|---|-----|------|---|
| Extraction Method          | Extraction matrix | Extraction part   | 200,000                             | 20,000 | 2000 | 200 | 20 | 2 | 0.2 | 0.02 | 0 |
| Simple elution             | Paracheck-Pf      | 1 cm              |                                     |        |      |     |    |   |     |      |   |
|                            | SD-Bioline        | 1 cm              | X                                   | X      | X    | X   | X  | X |     |      |   |
|                            | Filter paper      | 5μL               | X                                   | X      | X    | X   |    |   |     |      |   |
| Chelex-100                 | Paracheck-Pf      | 1 cm              | X                                   | X      | X    | X   |    |   |     |      |   |
|                            |                   | Proximal half     | X                                   | X      | X    | X   | X  |   |     |      |   |
|                            | SD-Bioline        | 1 cm              | X                                   | X      | X    | X   |    |   |     |      |   |
|                            |                   | Proximal half     | X                                   | X      | X    | X   |    |   |     |      |   |
|                            | Filter paper      | 5μL               | X                                   | X      | X    | X   | X  | X |     |      |   |
| ABI                        | Paracheck-Pf      | 1 cm              | X                                   | X      | X    | X   |    |   |     |      |   |
|                            |                   | Proximal half     | X                                   | X      | X    | X   |    |   |     |      |   |
|                            |                   | Distal two-thirds | X                                   | X      | X    | X   | X  |   |     |      |   |
|                            |                   | Whole RDT         | X                                   | X      | X    | X   |    |   |     |      |   |
|                            | SD-Bioline        | 1 cm              | X                                   | X      | X    | X   | X  |   |     |      |   |
|                            |                   | Proximal half     | X                                   | X      | X    | X   |    | X |     |      |   |
|                            |                   | Distal two-thirds | X                                   | X      | X    | X   | X  |   |     |      |   |
|                            |                   | Whole RDT         | X                                   | X      | X    | X   | X  |   |     |      |   |
|                            | Filter paper      | 5μL               | X                                   | X      | X    | X   |    |   |     |      |   |

| C) 18s rDNA probe based real-time PCR |                   |                   | Dilution series (1:10 parasites/ $\mu$ L) |        |      |      |      |      |     |      |    |
|---------------------------------------|-------------------|-------------------|-------------------------------------------|--------|------|------|------|------|-----|------|----|
| Extraction Method                     | Extraction matrix | Extraction part   | 200,000                                   | 20,000 | 2000 | 200  | 20   | 2    | 0.2 | 0.02 | 0  |
| Simple elution                        | Paracheck-Pf      | 1cm               | NA                                        | NA     | NA   | NA   | NA   | NA   | NA  | NA   | NA |
|                                       | SD-bioline        | 1cm               | NA                                        | NA     | NA   | NA   | NA   | NA   | NA  | NA   | NA |
|                                       | Filter paper      | 5 $\mu$ L         | NA                                        | NA     | NA   | NA   | NA   | NA   | NA  | NA   | NA |
| Chelex-100                            | Paracheck-Pf      | 1cm               | 28.4                                      | 27.7   | 31.5 | 35.6 | 37.5 | 39.6 |     |      |    |
|                                       |                   | Proximal half     | 24.1                                      | 27.1   | 30.6 | 33.7 | 37.5 |      |     |      |    |
|                                       | SD-Bioline        | 1cm               | 24.0                                      | 27.7   | 35.1 | 33.7 | 36.9 | 39.7 |     |      |    |
|                                       |                   | Proximal half     | 24.3                                      | 28.3   | 31.6 | 34.5 | 36.0 | 39.3 |     |      |    |
|                                       | Filter paper      | 5 $\mu$ L         | 25.7                                      | 27.3   | 30.6 | 34.2 | 36.3 | 38.3 |     |      |    |
| ABI                                   | Paracheck-Pf      | 1cm               | 27.4                                      | 33.5   | 35.6 | 40.5 |      |      |     |      |    |
|                                       |                   | Proximal half     | 26.4                                      | 30.2   | 34.6 | 37.2 |      | 39.4 |     |      |    |
|                                       |                   | Distal two-thirds | 26.7                                      | 32.8   | 36.3 | 41.0 |      |      |     |      |    |
|                                       |                   | Whole RDT         | 28.3                                      | 31.8   | 34.3 | 37.3 | 40.3 |      |     |      |    |
|                                       | SD-Bioline        | 1cm               | 29.3                                      | 33.9   | 37.3 | 40.0 | 40.1 |      |     |      |    |
|                                       |                   | Proximal half     | 29.2                                      | 32.0   | 36.7 | 38.6 | 40.1 |      |     |      |    |
|                                       |                   | Distal two-thirds | 28.0                                      | 31.0   | 34.0 | 37.4 |      |      |     |      |    |
|                                       |                   | Whole RDT         | 29.5                                      | 32.9   | 36.1 | 38.8 | 39.0 |      |     |      |    |
|                                       | Filter paper      | 5 $\mu$ L         | 32.8                                      | 36.3   | 39.1 |      |      |      |     |      |    |

NA = Not determined due to the limiting DNA extraction volume.
